# Supplementary material for: Interruption of OX40L signaling prevents costimulation blockade–resistant allograft rejection
Source: JCI journal article supplement (doi:10.1172/jci.insight.90317), 2017-03-08

**Supplementary Figure 1:** Rhesus macaque recipients of renal transplants treated with combined blockade (belatacept + anti-OX40L) showed no re-activation of CMV while on treatment (n= 5)

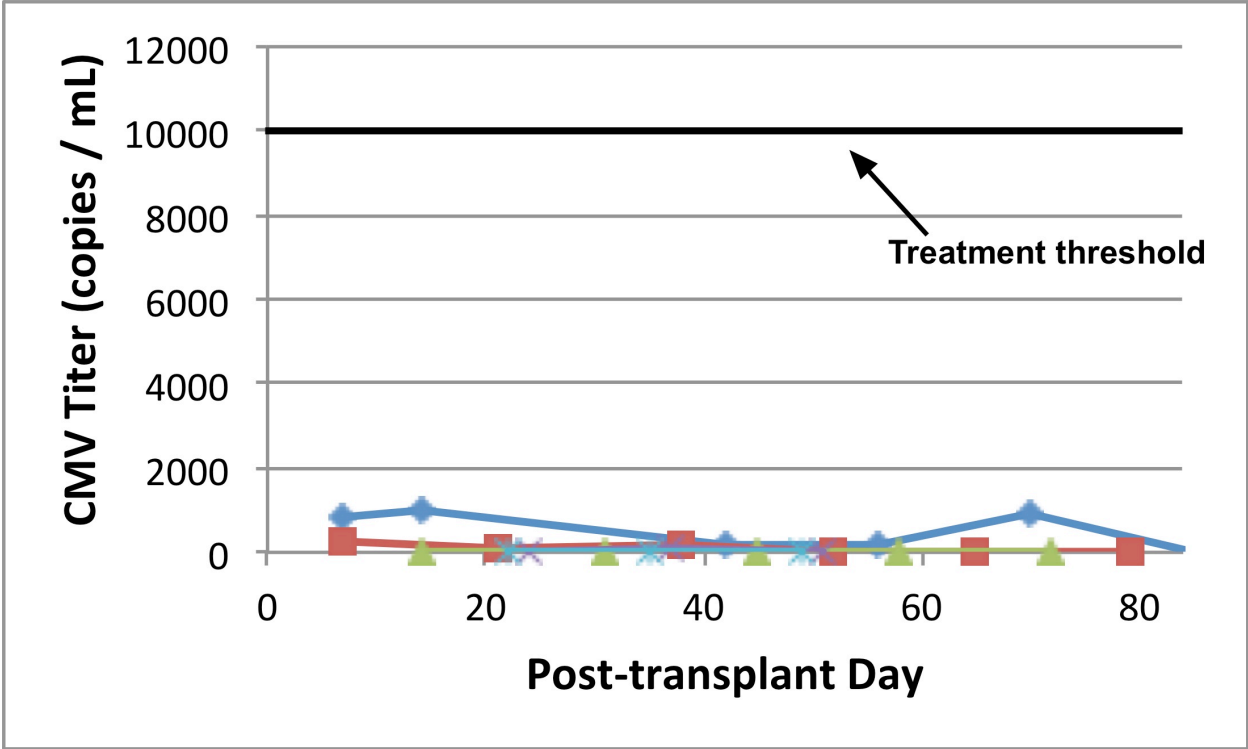

Supplement: sd1 [file 1]
